# Supplementary material for: FeIII-Driven Self-Cycled Fenton via Contact-Electro-Catalysis for Water Purification
Source: Research Square preprint supplement (doi:10.21203/rs.3.rs-6143363/v1), 2025-04-29
Supplement: Supplementary file 1 [file bd367ea5046f86be80ee47b9.docx]

**Supporting information**

**FeIII-Driven Self-Cycled Fenton via Contact-Electro-Catalysis for Water Purification**

Dongmei Ma †,‡,1, Jin Zhang †,1, Wei Li †,‡,*, Jinxing Ma §, Kuanchang He §, Kui Yang §, Jianghu Cui †,‡, Qian Liu †, Sihao Lv †, Min Zhang ‡, Faliang Cheng ‡, Defeng Xing ¶

† *Research Center for Eco-environmental Engineering, School of Environment and Civil Engineering, Dongguan University of Technology, Dongguan 523808, China*

‡ *Guangdong Engineering and Technology Research Center for Advanced Nanomaterials, School of Environment and Civil Engineering, Dongguan University of Technology, Dongguan 523808, China*

§ *School of Ecology, Environment and Resources, Guangdong University of Technology, Guangzhou 510006, China*

*¶ State Key Laboratory of Urban Water Resource and Environment, School of Environment, Harbin Institute of Technology, Harbin 150090, China*

1 Dongmei Ma and Jin Zhang contributed equally to this work

* **Corresponding author**. Research Center for Eco-environmental Engineering, Dongguan University of Technology, Dongguan 523808, China

E-mail address: liwei@dgut.edu.cn

*The supplementary file included:* ***6 Notes****,* ***5 Tables****,* ***21 Figures.***

**Supplementary Note 1. The detection of Fe species and in-situ detection of fresh FeII**

***Note 1.1 The ex-situ detection of FeII and FeIII by 1,10-phenanthroline spectrophotometry:***

For FeII quantification, 1 mL of filtered liquid sample was added into a 20 mL colorimetric tube. The analytical sequence proceeded as follows: 2 mL of acetic acid/sodium acetate solution (pH = 4.6), 0.4 mL of 1,10-phenanthroline solution (1.2 g·L–1), and 6.6 mL of DI water were introduced. After 5 min of controlled chromogenic development under ambient conditions, absorbance measurements were analyzed by a UV-Vis spectrophotometer at 510 nm. FeII concentrations were calculated through linear regression against pre-established calibration curves.

FeIII concentrations was calculated by difference between total Fe and FeII concentrations. For total Fe quantification, 1 mL of filtered liquid sample was introduced into a 20 mL colorimetric tube, followed by the addition of 2 mL of acetic acid/sodium acetate solution (pH = 4.6), 0.4 mL of hydroxylamine hydrochloride (100 g·L–1), 0.4 mL of 1,10-phenanthroline solution (1.2 g·L–1), and 6.2 mL of DI water. Following 5 min of standardized chromogenic development under ambient conditions, absorbance measurements were measured by a UV-Vis spectrophotometer at 510 nm. Total Fe concentrations were derived from pre-established calibration curves, with FeIII levels determined by subtracting FeII values from total Fe measurements.

***Note 1.2 The in-situ detection of fresh FeII by 1,10-phenanthroline spectrophotometry:***

A reaction system containing 3 mg of FEP particles and 0.1 mL of FeIII stock solution (300 mM) was prepared 30 mL of 1,10-phenanthroline solution (48 mg·L–1). The mixture underwent ultrasound irradiation at 110 W, 40 kHz. The reaction solution was withdrawn at certain time intervals and analyzed by a UV-Vis spectrophotometer at 510 nm. The detection limit of this method could reach to 0.01 mM of FeII.

**Supplementary Note 2. Chemical regents**

The fluorinated ethylene propylene (FEP, average 5 μm) and polyvinylidene fluoride (PVDF, average 6.5 μm) were purchased from Mingshun Chemical Co. Ltd. (Guangdong, China). The polytetrafluoroethylene (PTFE, <d> ~ 1−5 μm), FeCl3, FeCl2⋅4H2O, potassium titanyl oxalate, sulfadiazine (SDZ), phenol (PE), atrazine (ATZ), and methanol (MeOH) were supplied by Aladdin Chemistry Co. Ltd. (Shanghai, China).

**Supplementary Note 3. The fluorescence-based method for hydroxyl radical detection**

The hydroxyl radical was analyzed by a fluorescence-based method using terephthalic acid (TA) as the molecule probe1. Specifically, 3 mg of FCPs powders were dispersed in 30 mL TA solution (0.5 mM). Then the reaction was driven by an ultrasound bath (BRANSON, 3800-CPXH, USA) at 25 ± 2 °C, along with 40 kHz and 110 W. At the 10 min intervals, 3 mL filtered liquid sample was analyzed for fluorescent intensity at 425 nm (excited at 312 nm) with a fluorescence spectrometer (Shimadzu, RF-6000).

**Supplementary Note 4. The detection of reactive species by electron paramagnetic resonance (EPR)**

***Note 4.1 The detection of hydroxyl radical by EPR***

The EPR analysis of hydroxyl radical was conducted with 5,5-dimethyl-1-pyrroline-1-oxide (DMPO) as trapping agent: 3 mg of FCPs powders were dispersed in 30 mL of DMPO solution (100 mM). Then the reaction was driven by an ultrasound bath (BRANSON, 3800-CPXH, USA) at 25 ± 2 °C, along with 40 kHz and 110 W. At 2, 5, 10 min, the solution product was analysed by the EPR spectroscopy (Bruker, A200S-95, GER).

***Note 4.2 The detection of superoxide radical by EPR***

The EPR analysis of superoxide radical was conducted with DMPO (100 mM) as trapping agent in the dimethyl sulfoxide solvent (DMSO, 1 M). Then the reaction was driven by an ultrasound bath (BRANSON, 3800-CPXH, USA) at 25 ± 2 °C, along with 40 kHz and 110 W. The solution product was analysed by the EPR spectroscopy (Bruker, A200S-95, GER).

**Supplementary Note 5. Density functional theory (DFT) calculations**

We have employed the Vienna Ab Initio Package (VASP) to perform DFT calculations within the generalized gradient approximation (GGA) in the PBE formulation. We have chosen the projected augmented wave (PAW) potentials to describe the ionic cores and taken valence electrons into account using a plane wave basis set with a kinetic energy cutoff of 450 eV. Partial occupancies of the Kohn−Sham orbitals were allowed using the Methfessel-Paxton smearing method and a width of 0.05 eV. The electronic energy was considered self-consistent when the energy change was smaller than 10−5 eV. A geometry optimization was considered convergent when the residual forces were smaller than 0.05 eV/Å. Finally, the free energy of a gas phase molecule or an adsorbate on the surface was calculated by the equation G = E + ZPE − TS, where E is the total energy, ZPE is the zero-point energy, T is the temperature in kelvin (298.15 K is set here), and S is the entropy. For interfacial electric field (IEF) applied state structures, full optimization is performed by applying IEF (0.3 V/Å) to the system.

The molecular structure of FCPs was constructed according to their stoichiometric formula, incorporating a 12-carbon backbone structure. The configurations were shown as follow.

|  | FEP | PTFE | PVDF |
| --- | --- | --- | --- |
| Formula |  |  |  |
| Constructed structure |  |  |  |

The adsorption energies (Eads) between H2O and FCPs were computed by the Equation S1:

*E*ads = *E* (FCP+H2O) – *E*FCP – *E*H2O (S1)

where *E*(FCP+H2O) was the total energy of the system, *E*FCP was the energy of the FCP system alone, and *E*H2O was the energy of H2O in the vacuum.

**Supplementary Note 6. Characterizing the transferred electrons of FCP surface**

To mimic the transferred charges of FCP particles, three FCP films with 100 μm thickness was used to represent the FCP surface. These three FCP films (5 cm × 5 cm) were stuck to an acrylic base-supported copper paper (FCP@Cu) to assemble three single electrode triboelectric nanogenerator (SETENG). The contact-separation of SETENG and water was precisely controlled through a linear motor (R-LP3). The transferred electrons were quantitatively monitored using a digital oscilloscope (KEYSIGHT DSO-X 3024T) and high-impedance digital multimeter (Keithley 6514, 10 MΩ) to ensure measurement fidelity.

**Supplementary Table 1. The –F density of FEP, PTFE and PVDF.**

| Name | Structure | −F density a | Number of F | Number of C  (on main chain) |
| --- | --- | --- | --- | --- |
| Fluorinated ethylene propylene (FEP) |  | 2.5 | 10 | 4 |
| Polytetrafluoroethylene (PTFE) |  | 2 | 4 | 2 |
| Polyvinylidene fluoride (PVDF) |  | 1 | 2 | 2 |

a: –F density was defined as the atomic ratio of F to C (on the main chain).

**Supplementary Table 2. The comparison of H2O2 generation performance of reported Piezo-catalytic and Contact-electrification-catalytic materials.**

| Catalyst | Dosage of catalyst (mg L−1) | H2O2 accumulated yield (mM) | H2O2 generation rate (mmol·gcat−1·h−1) | References |
| --- | --- | --- | --- | --- |
| FEP | 100 | 0.767 | 7.67 | This study |
| PTFE | 100 | 0.324 | 3.24 | 2 |
| Au/BiVO4 | 500 | 0.0045 | 0.009 | 3 |
| Ag/t-BaTiO3 | 2000 | 0.0321 | 0.01605 | 4 |
| BiOCl | 500 | 0.0028 | 0.0056 | 5 |
| BiOIO3 | 500 | 0.115 | 0.46 | 6 |
| Bi12O17Cl12 | 500 | 0.194 | 0.388 | 7 |
| BaCaZrTi | 1000 | 0.02215 | 0.02215 | 8 |
| C3N5 | 500 | 0.523 | 0.626347305 | 9 |
| BiFeO3 | 1000 | 0.11 | 0.11 | 10 |
| BiTiNbO9 | 1000 | 0.247 | 0.185714286 | 11 |

**Supplementary Table 3. The adsorption energy between FCPs and H2O.**

| Name | Eads (eV) |
| --- | --- |
| FEP-H2O | –0.4783 |
| PTFE-H2O | –0.3125 |
| PVDF-H2O | –0.1098 |

**Supplementary Table 4. The comparison of degradation performance in CEC, piezo-catalysis and photo-catalysis induced self-cycled Fenton systems.**

|  | Conditions | Catalyst  (mg·L–1) | Pollutants  (mg·L–1) | H2O2 generation rate (mmol·gcat−1·h−1) | Iron source  (mM) | Time and degree of degradation (min, %) | *k*obs (min–1) | *kn*obsa  (L·min−1·g−1) | Ref |
| --- | --- | --- | --- | --- | --- | --- | --- | --- | --- |
| Contact-electro-catalysis | 110 W, 40 kHz | FEP  (100) | Sulfadiazine  (SDZ, 5) | 7.670 | FeIII  (1.0) | 60, 100 | 0.125 | 1.25 | This study |
| 120 W, 40 kHz | 2.5PTFE/ZSM-5 (333) | Methyl orange  (MO, 10) | 1.9788 | FeIII  (1.0) | 10, 98.5 | 0.458 | 1.36 | 12 |
| Piezo-catalysis | 152 W, 40 kHz | BIO  (500) | Sulfamethazine  (SMZ, 20) | 0.46 | FeIII  (1.0) | 30, 98 | 0.138 | 0.276 | 6 |
| 300 W, 40 kHz | C3N5  (500) | Tetracycline  (TC, 5) | 0.614 | FeIII  (0.004) | 100, 100 | 0.0561 | 0.112 | 9 |
| 100 W, 40 kHz | Bi12O17Cl12  (500) | Acetaminophen  (ACE, 10) | 0.388 | FeII  (1.0) | 60, ~75 | 0.023 | 0.046 | 7 |
| Photo-catalysis | λ> 420 nm,  700 mW·cm–2 | Garland g-C3N4  (500) | 2,4-dichlorophenol  (2, 4-DCP, 10) | 0.025 | FeII  (0.018) | 30, 88.8 | 0.07 | 0.14 | 13 |
| λ> 400 nm,  100 mW·cm–2 | g-C3N4  (500) | 2,4-dichlorophenol  (2, 4-DCP, 10) | 0.05 | FeIII  (0.07) | 60, 98.73 | 0.069 | 0.138 | 14 |

a: *k*obs normalized at catalyst dosage.

**Supplementary Table 5. The detection paramaters for various pollutants**

| EPs | Abbreviations | Mobile phase (v/v) | Detection wavelength (nm) | Retention time |
| --- | --- | --- | --- | --- |
| Sulfadiazine | SDZ | Acetonitrile/0.2% formic acid (30/70) | 270 | 2.9 |
| Carbamazepine | CBZ | Acetonitrile/H2O (40/60) | 286 | 1.5 |
| Phenol | PE | Acetonitrile/H2O (40/60) | 280 | 1.0 |
| Atrazine | ARZ | Methanol/H2O2 (30/70) | 225 | 1.2 |


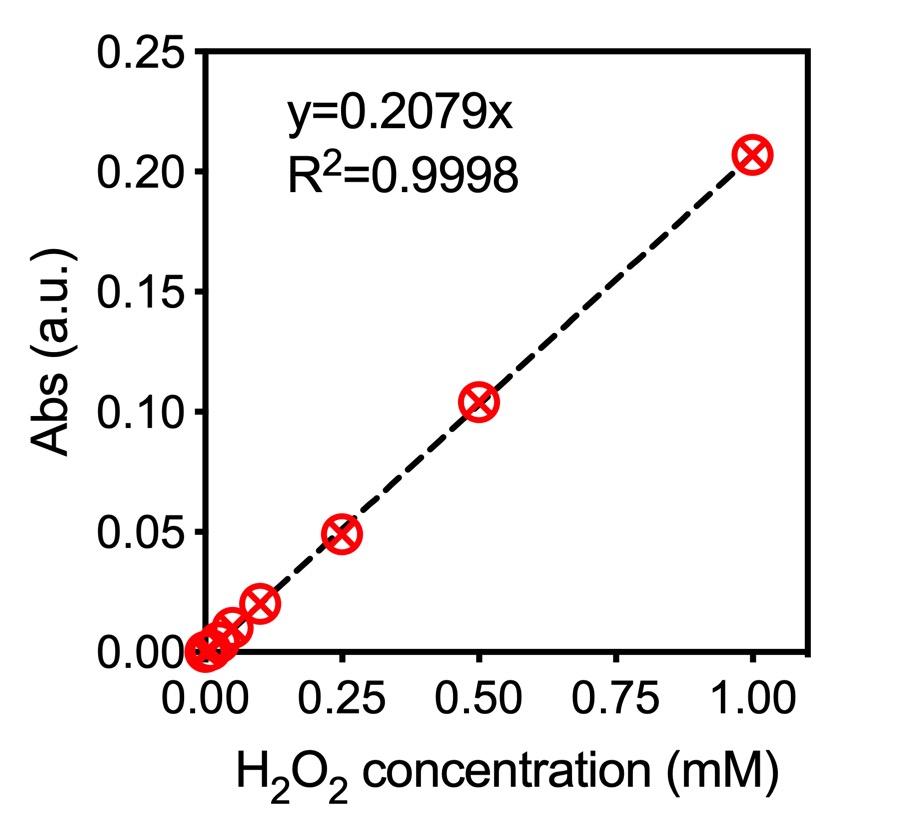


**Supplementary Figure 1**. The standard curve between the concentration of H2O2 and the absorbance (Linear equation: y = 0.2079x, *R2*= 0.9998).


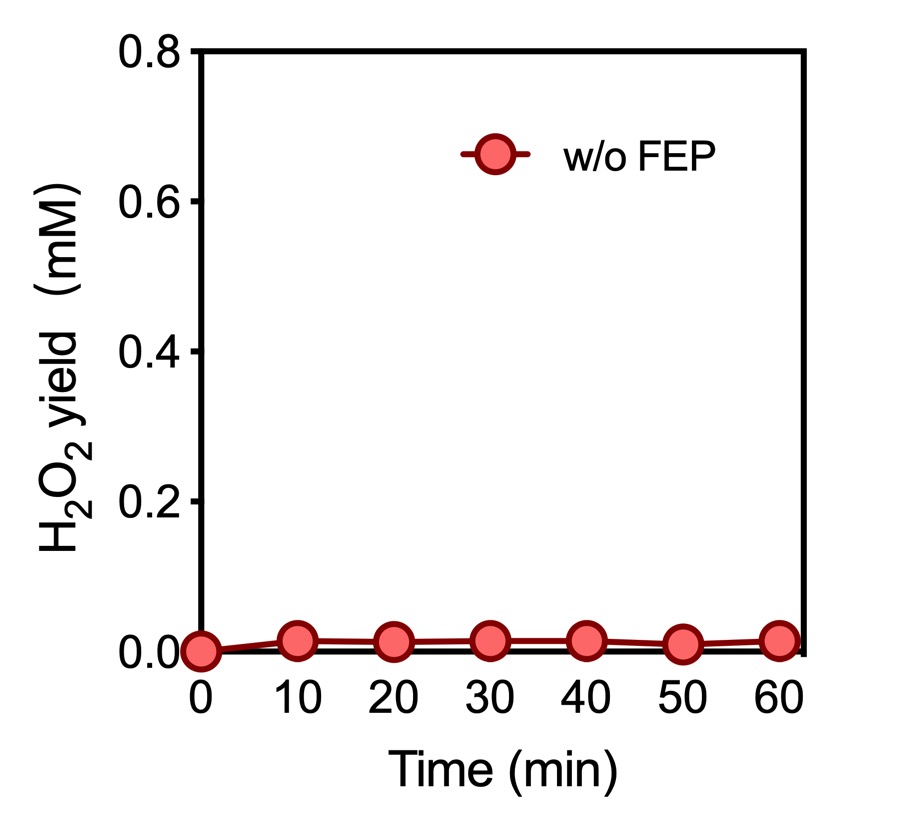


**Supplementary Figure 2**. The H2O2 production under ultrasound irradiation (US) without addition of FEP. Experimental conditions: [FEP]0 = 0 g·L–1,T = 25 ± 2°C, ultrasound irradiation (40 kHz, 110 W).

**
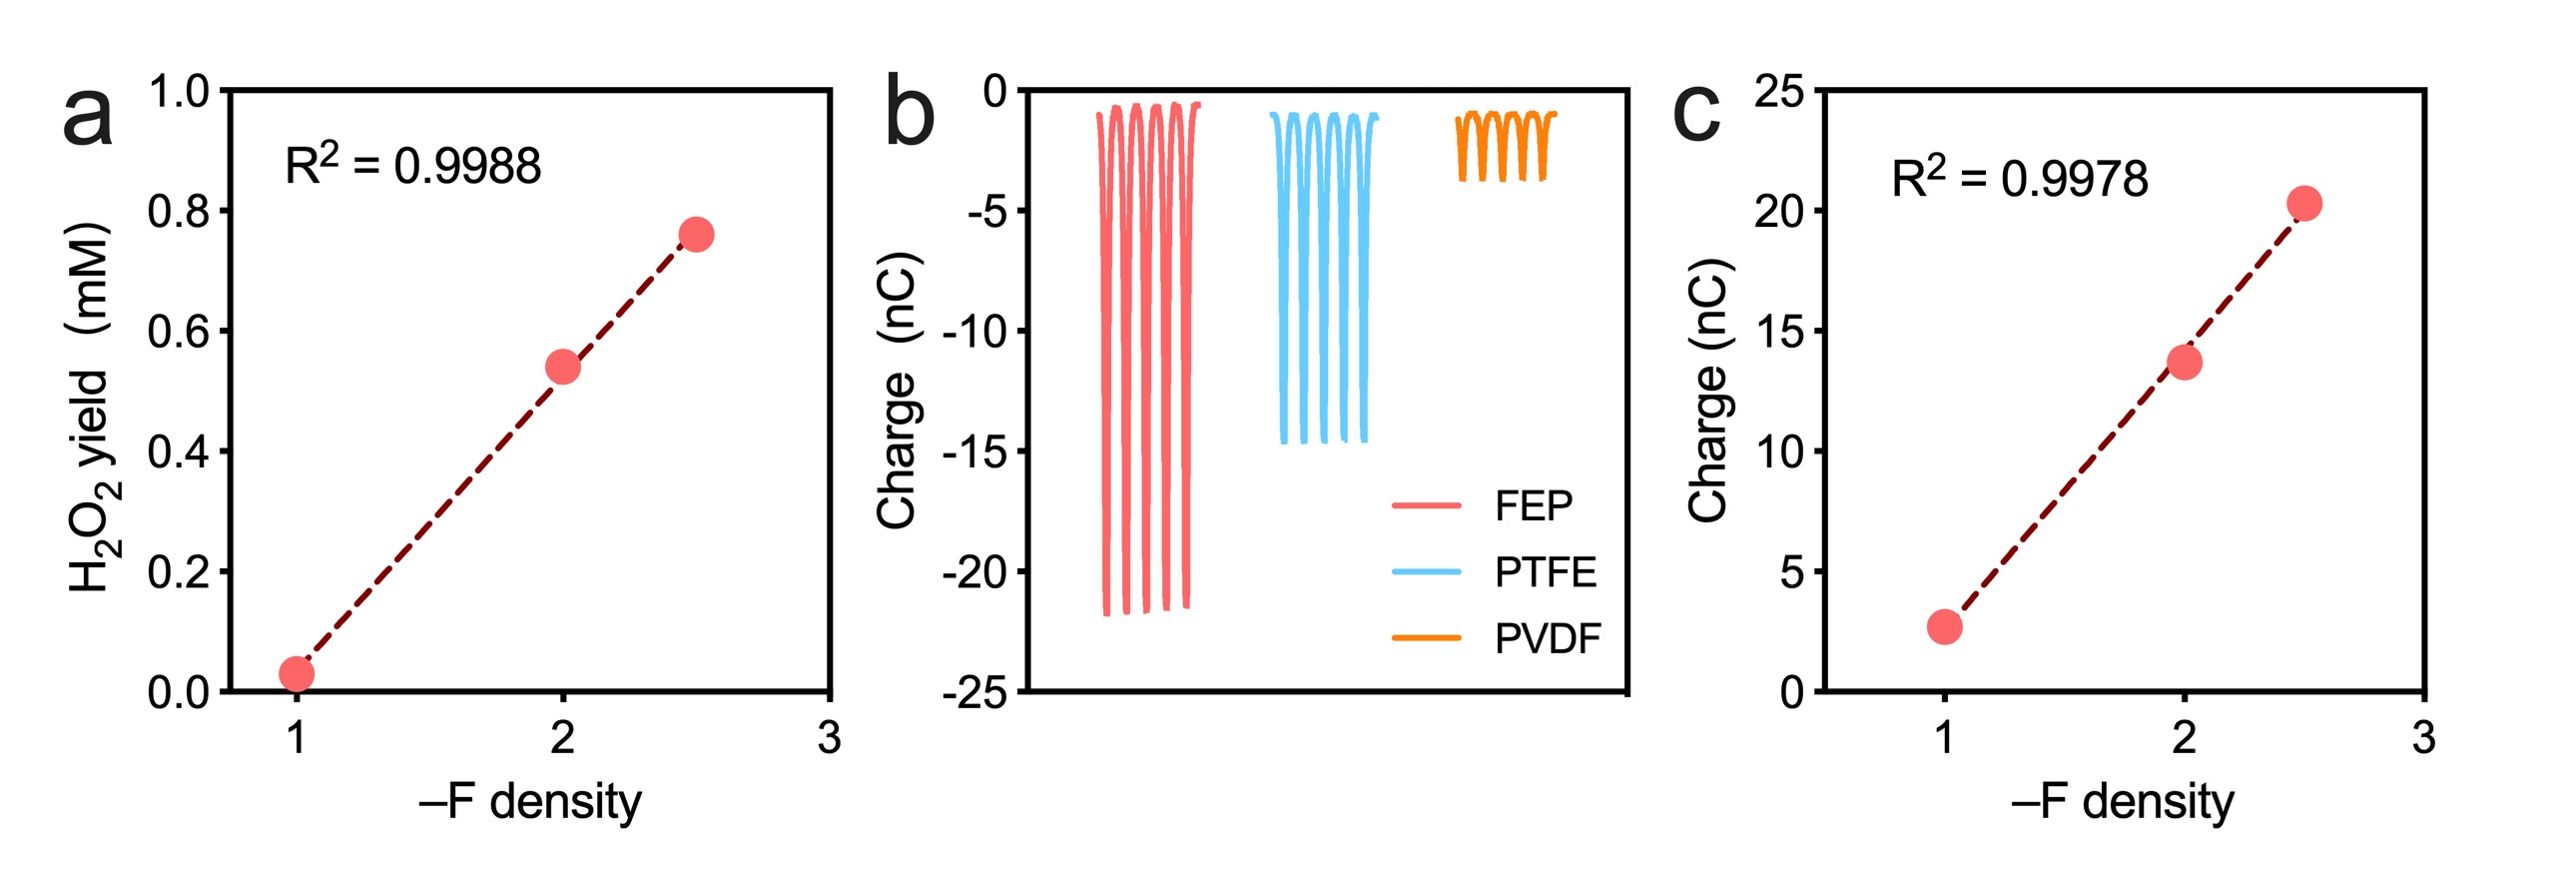
**

**Supplementary Figure 3**. The correlations between −F density and H2O2 accumulated amount (a). The transferred electrons of FCPs (FEP, PTFE, and PVDF) in contact with H2O (b). The correlations between −F density and the number of transferred electrons (c). Experimental conditions: [FCPs]0 = 0.1 g·L–1, T = 25 ± 2°C, ultrasound irradiation (40 kHz, 110 W).


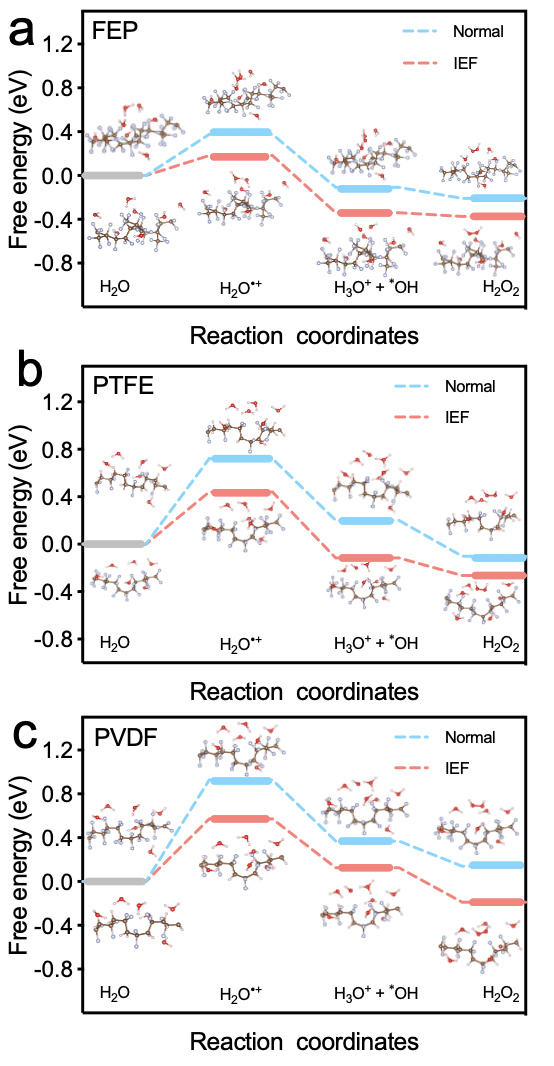


**Supplementary Figure 4**.Free energy profile of the indirect 2e– WOR process in FEP/CEC (a), PTFE/CEC (b), and PVDF (c) were compared with and without IEF.


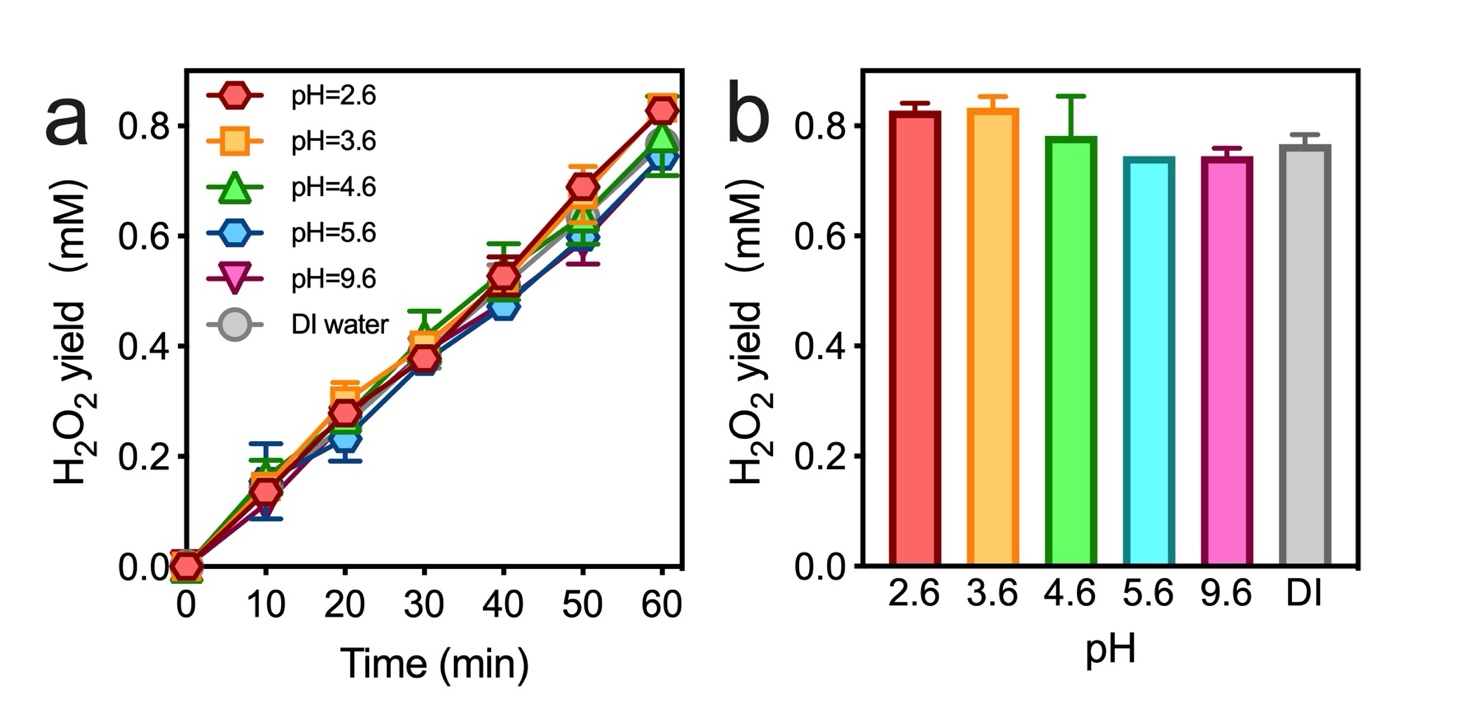


**Supplementary Figure 5**. Time course of the H2O2 generation (a) and final yield of H2O2 in FEP/CEC under different pH conditions. Experimental conditions: [FEP]0 = 0.1 g·L–1, T = 25 ± 2°C, ultrasound irradiation (40 kHz, 110 W).


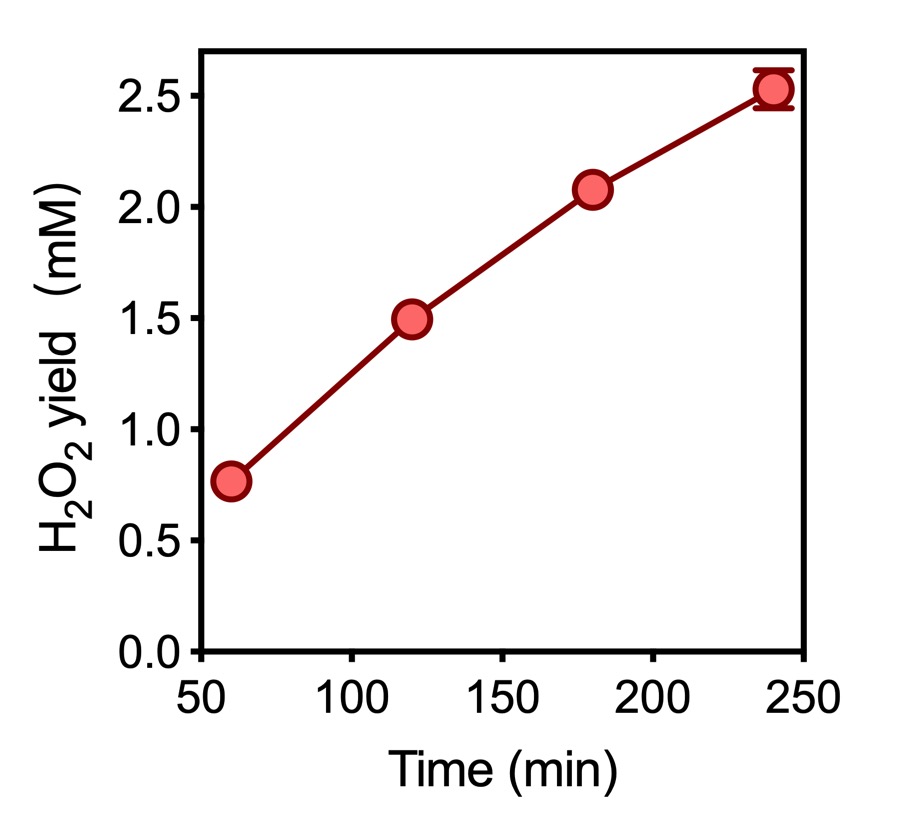


**Supplementary Figure 6**.The H2O2 yield of FEP/CEC from 1 to 4 h. Experimental conditions: [FEP]0 = 0.1 g·L–1, T = 25 ± 2°C, ultrasound irradiation (40 kHz, 110 W).


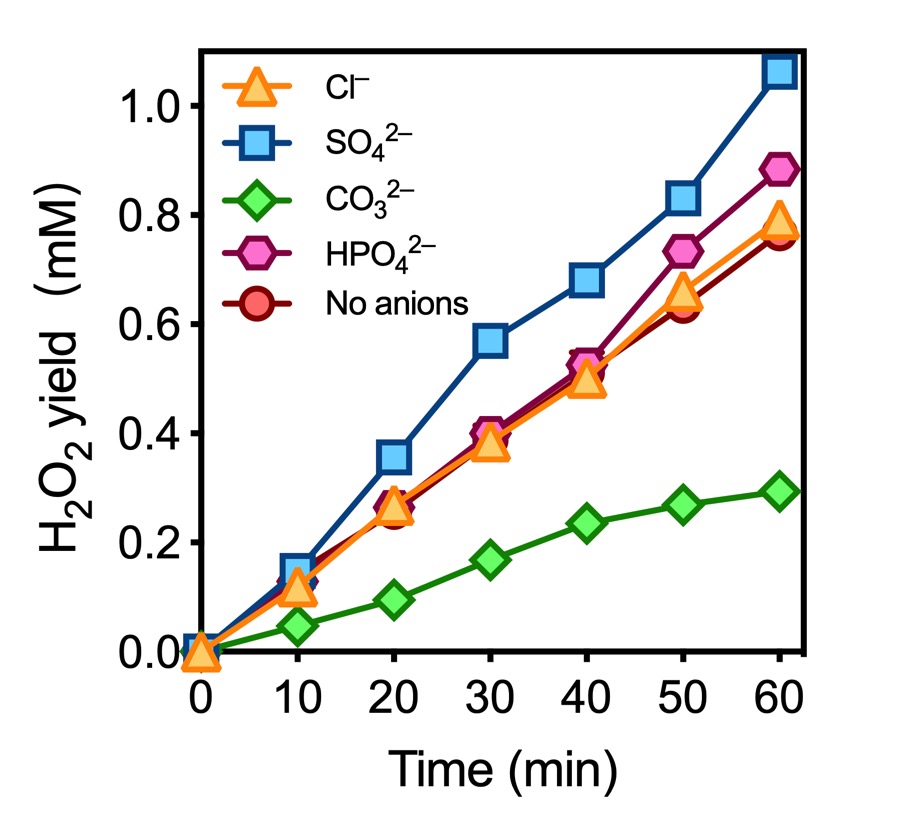


**Supplementary Figure 7**. The H2O2 yield of FEP/CEC in the presence of anions. Experimental conditions: [FEP]0 = 0.1 g·L–1, [Anions]0 = 5 mM, T = 25 ± 2°C, ultrasound irradiation (40 kHz, 110 W).


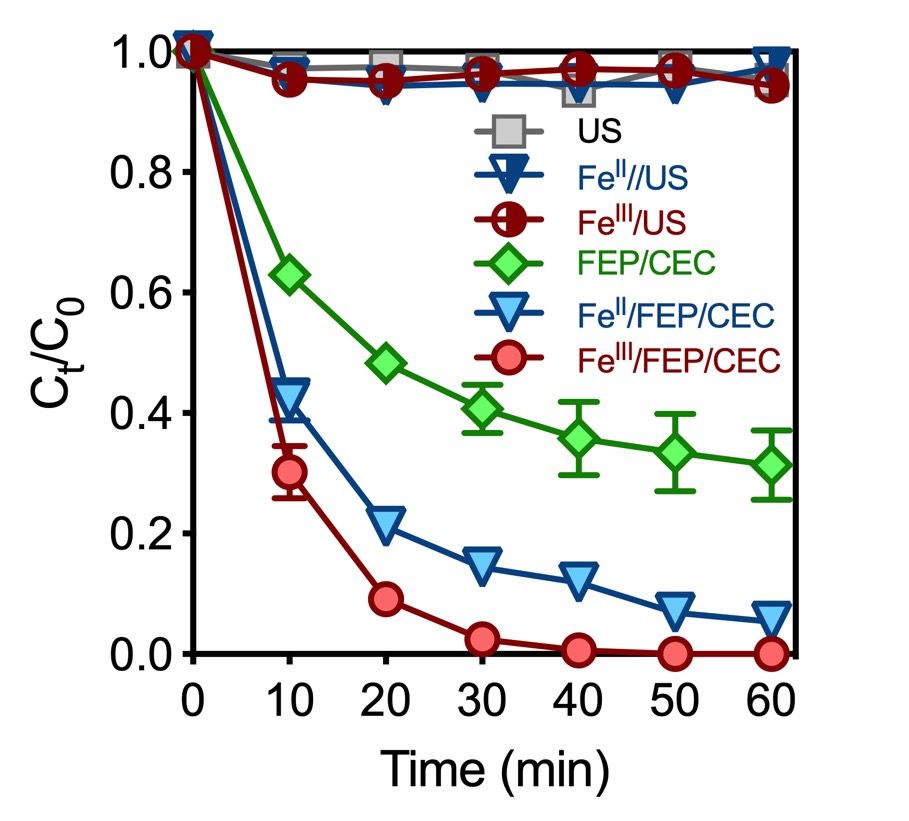


**Supplementary Figure 8**.The SDZ degradation performance by US, FeII/US, FeIII/US, FEP/CEC, FeII/FEP/CEC and FeIII/FEP/CEC. Experimental conditions: [FEP]0 = 0.1 g·L–1, [FeIII]0 = [FeII]0 = 1 mM, [SDZ]0 = 5 mg·L–1, T = 25 ± 2°C, ultrasound irradiation (40 kHz, 110 W).


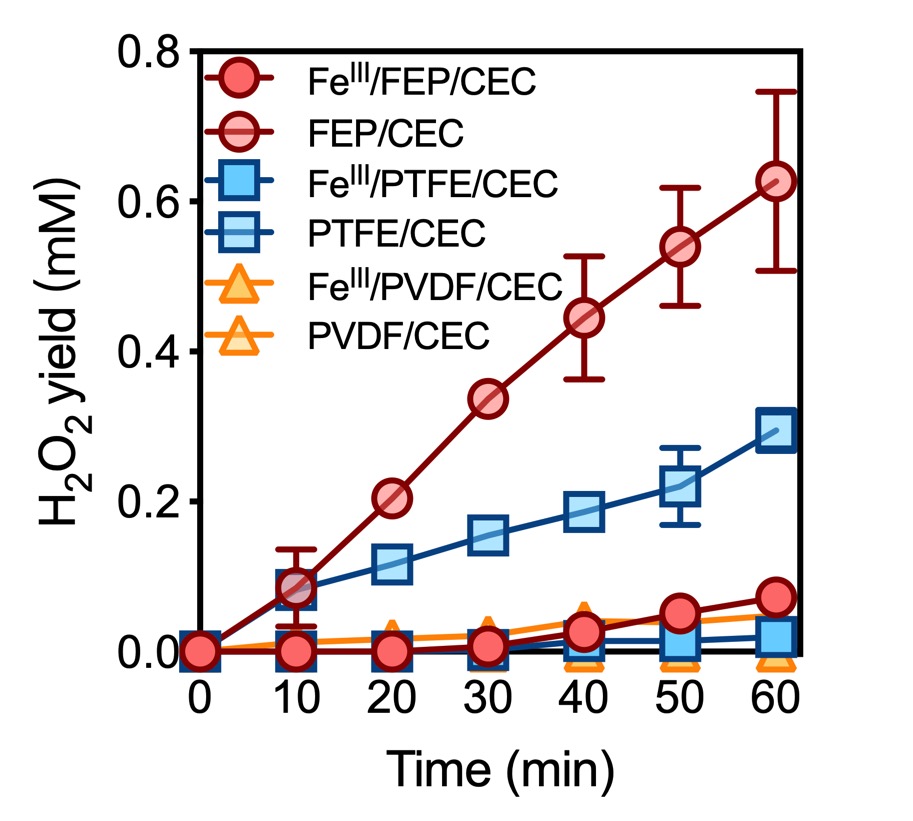


**Supplementary Figure 9**. The H2O2 yield during FCP/CEC and FeIII/FCP/CEC for SDZ degradation. Experimental conditions: [FEP]0 = 0.1 g·L–1, [SDZ]0 = 5 mg·L–1, T = 25 ± 2°C, ultrasound irradiation (40 kHz, 110 W).


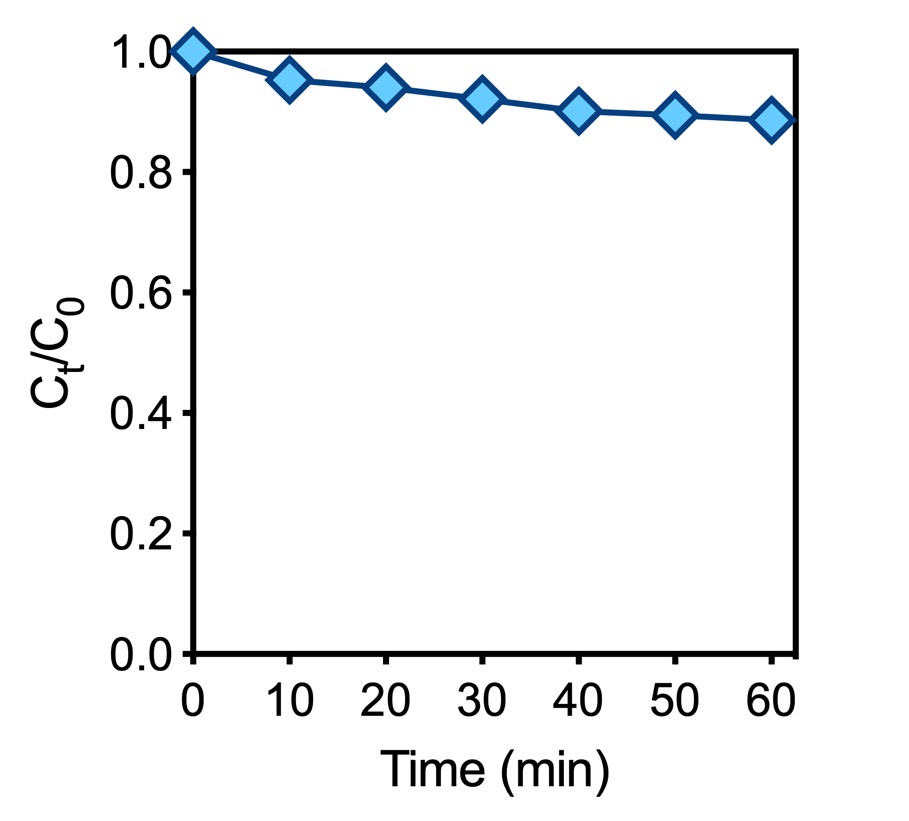


**Supplementary Figure 10**. The SDZ degradation in H2O2/US. Experimental conditions: [H2O2]0 = 0.5 mM, [SDZ]0 = 5 mg·L–1, T = 25 ± 2°C, ultrasound irradiation (40 kHz, 110 W).


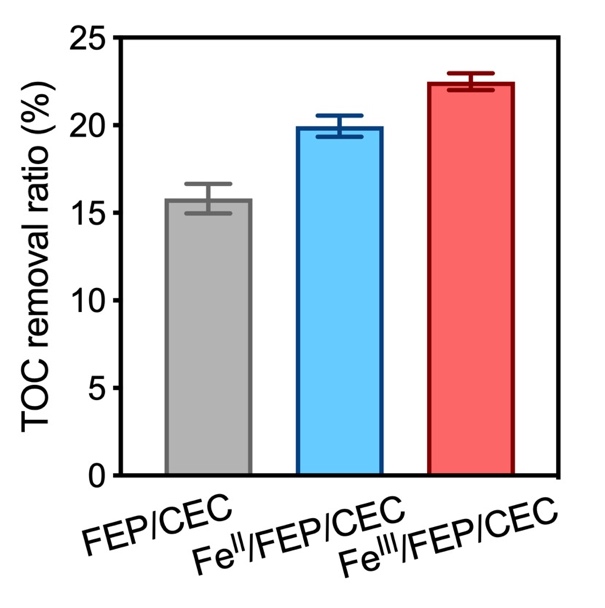


**Supplementary Figure 11**. The TOC removal rate of FEP/CEC, FeII/FEP/CEC and FeIII/FEP/CEC. Experimental conditions: [FEP]0 = 0.1 g·L–1, [FeIII]0 = [FeII]0 = 1 mM, [SDZ]0 = 5 mg·L–1, T = 25 ± 2°C, ultrasound irradiation (40 kHz, 110 W).

**
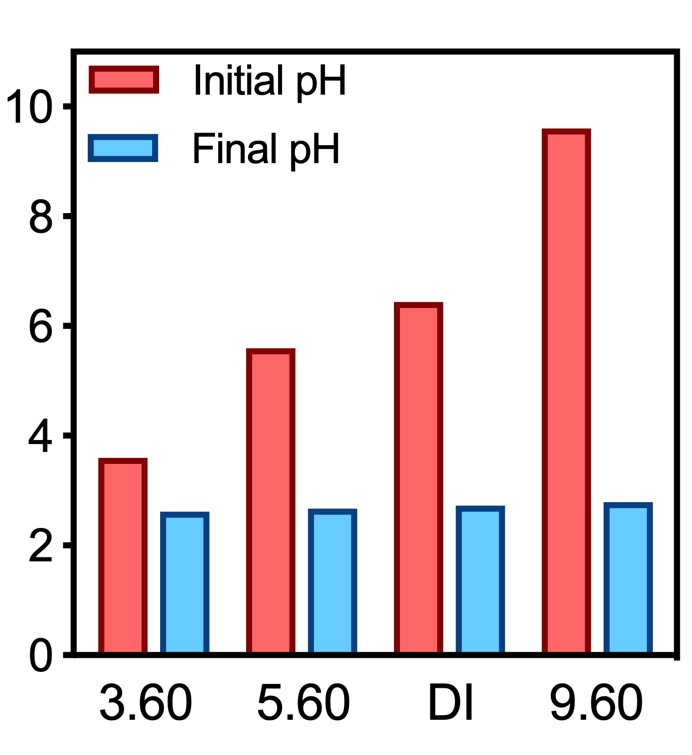
**

**Supplementary Figure 12**. The pH changes of FeIII/FEP/CEC under different initial pH conditions. Experimental conditions: [FEP]0 = 0.1 g·L–1, [FeIII]0 = [FeII]0 = 1 mM, [SDZ]0 = 5 mg·L–1, T = 25 ± 2°C, ultrasound irradiation (40 kHz, 110 W).

**
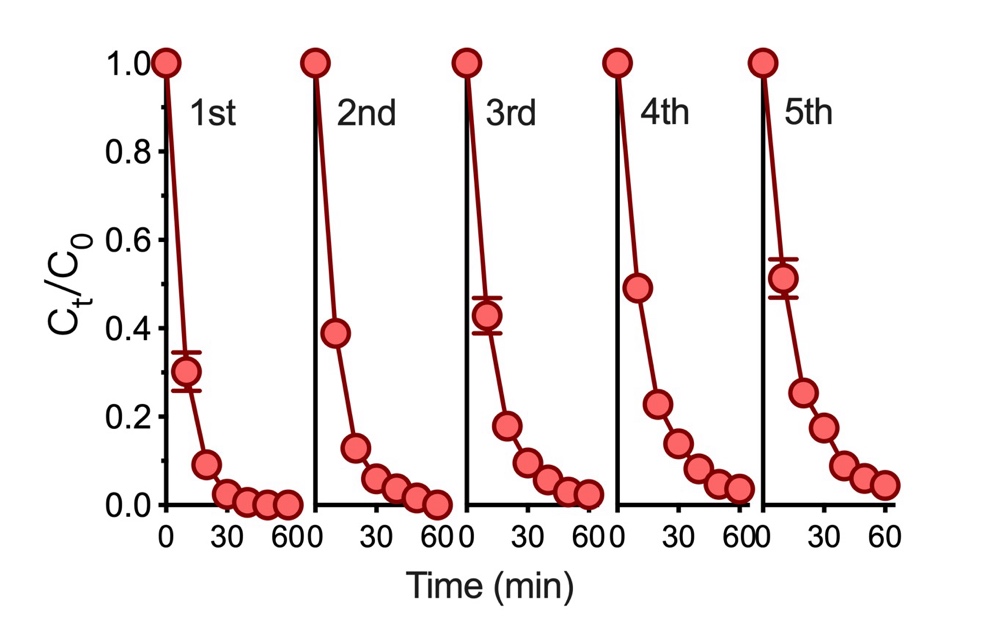
**

**Supplementary Figure 13**.The catalytic stability of FeIII/FCP/CEC on SDZ degradation during reutilization. Experimental conditions: [FEP]0 = 0.1 g·L–1, [SDZ]0 = 5 mg·L–1, [FeIII] = 1 mM, T = 25 ± 2°C, ultrasound irradiation (40 kHz, 110 W).


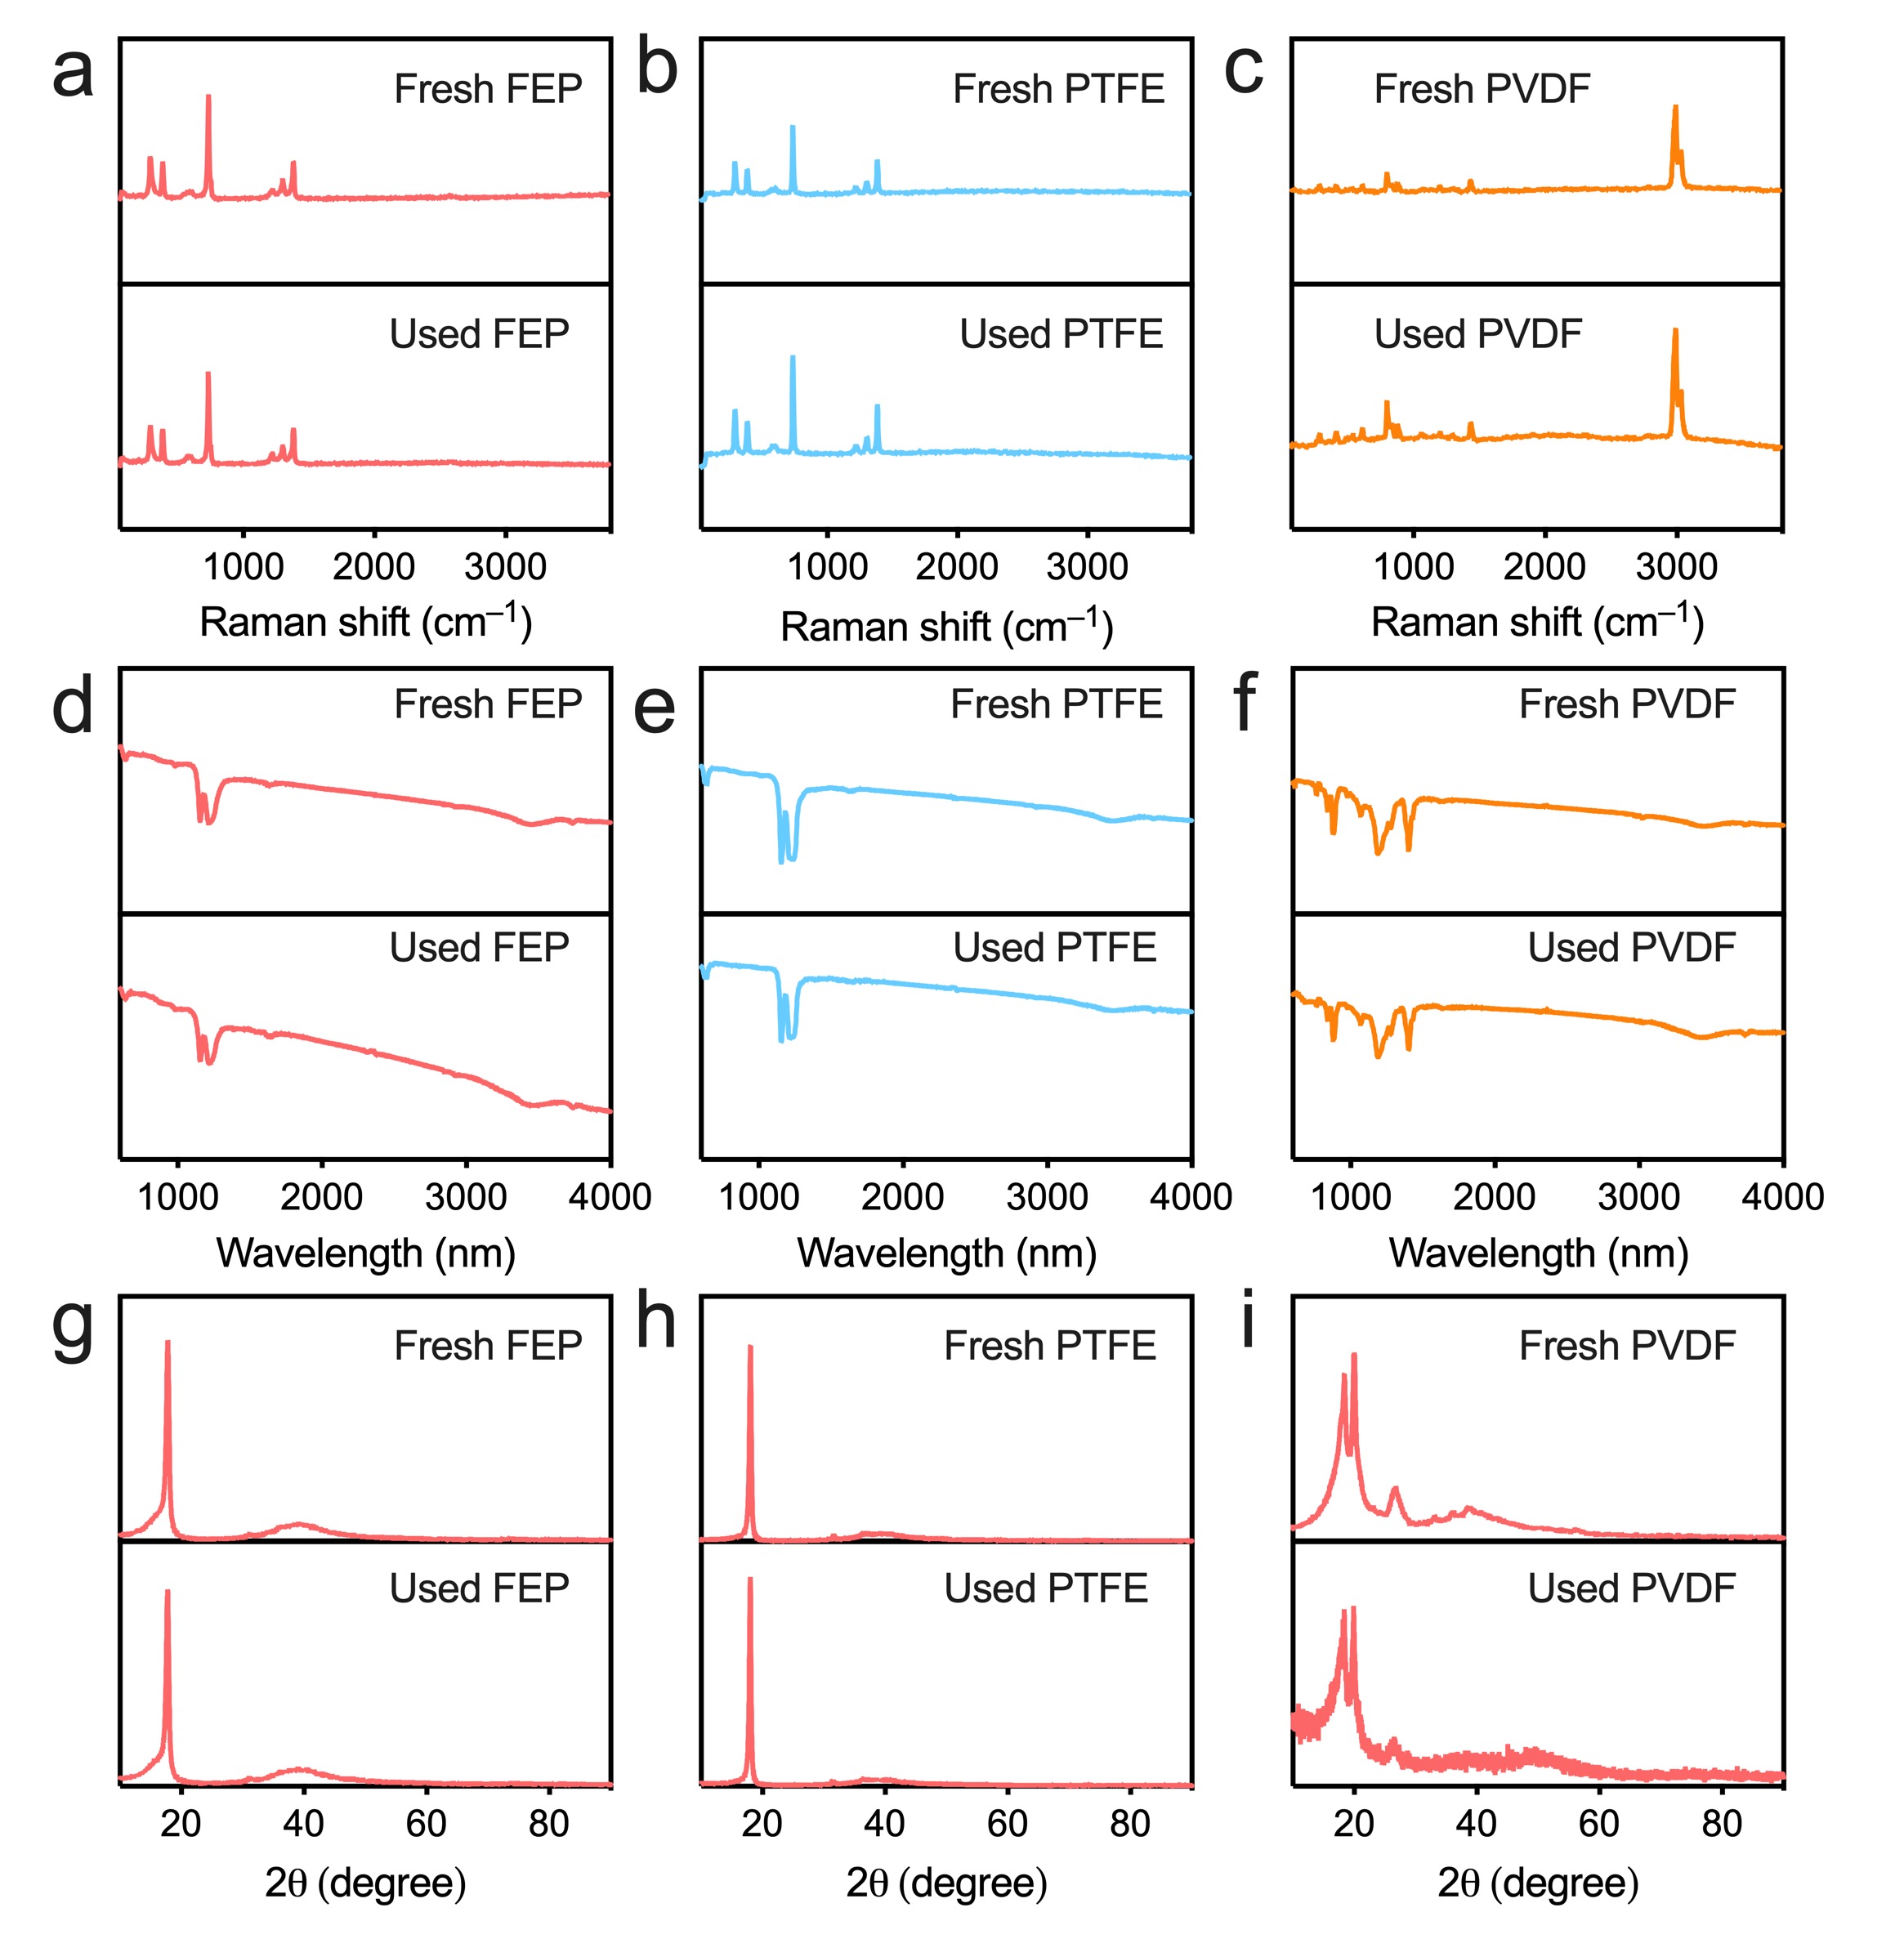


**Supplementary Figure 14**. The Raman spectra (a-c), FT-IR spectra (d-f), and the XRD diffraction peaks (g-i) of FCPs before and after reaction.


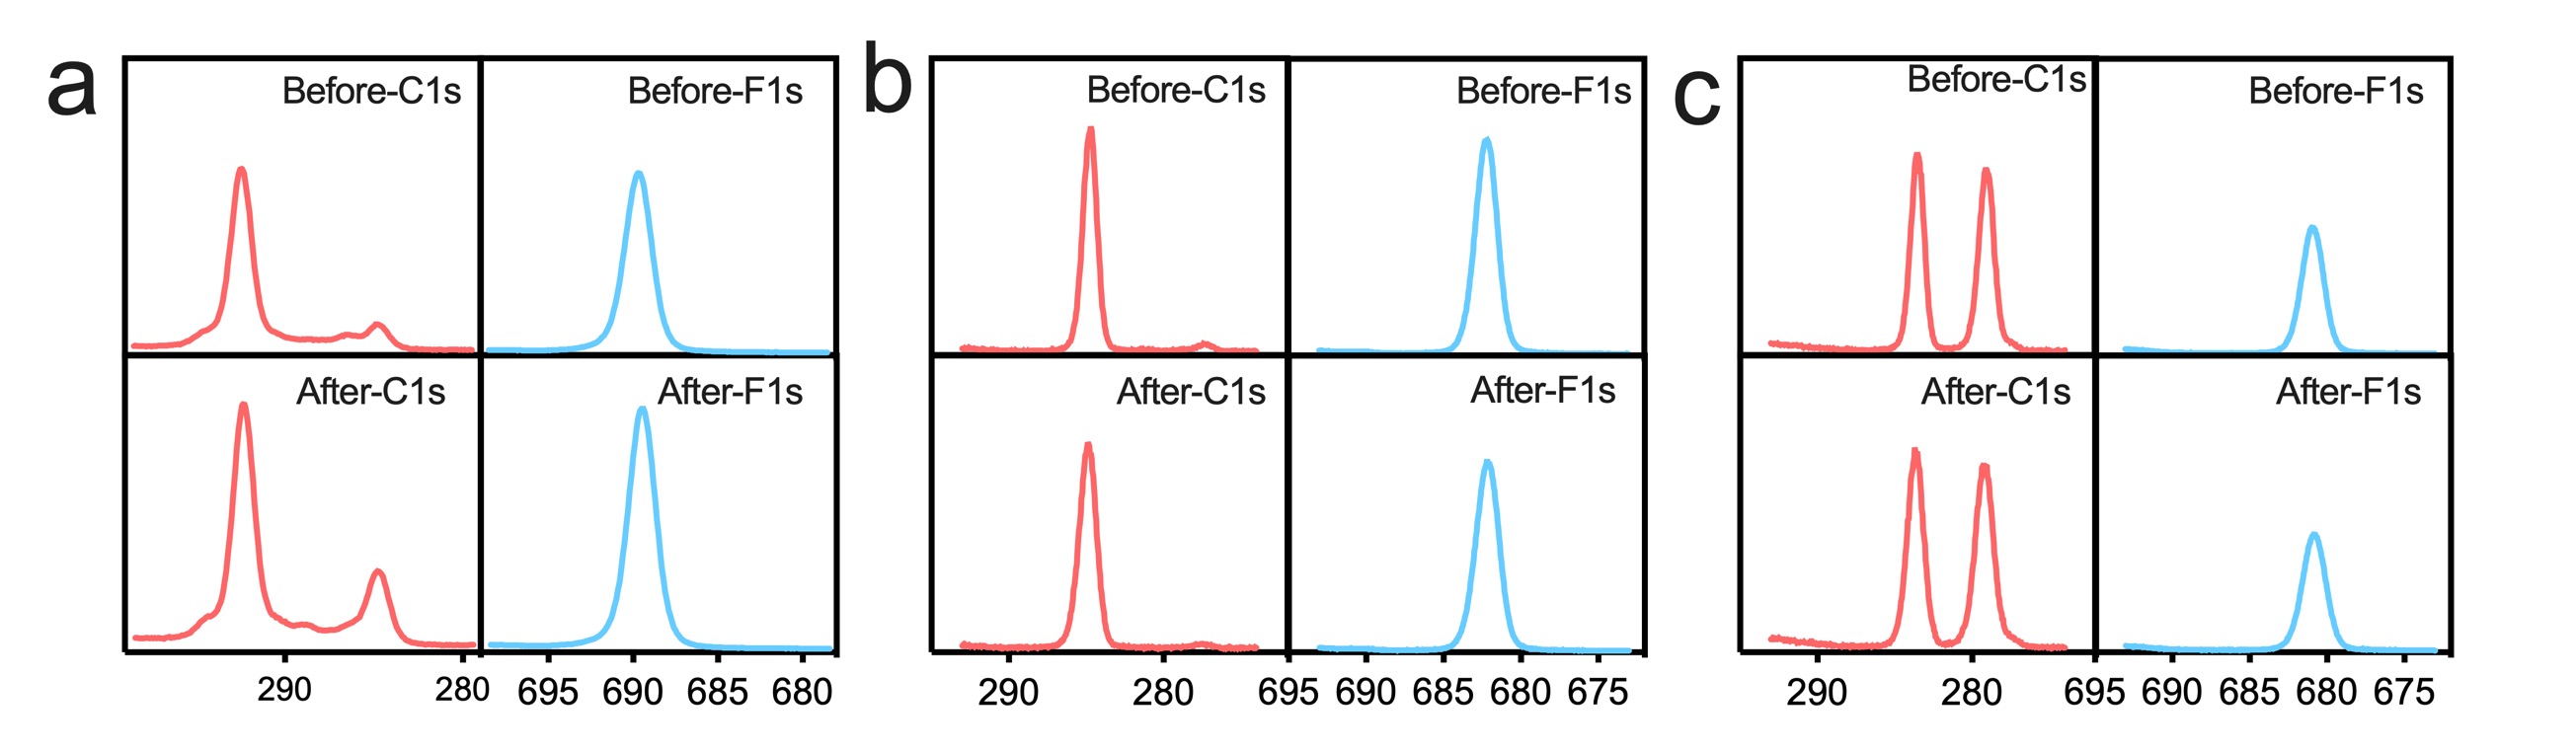


**Supplementary Figure 15**. The C1s and F1s XPS spectra of FEP (a), PTFE (b), and PVDF (c) before and after reaction.


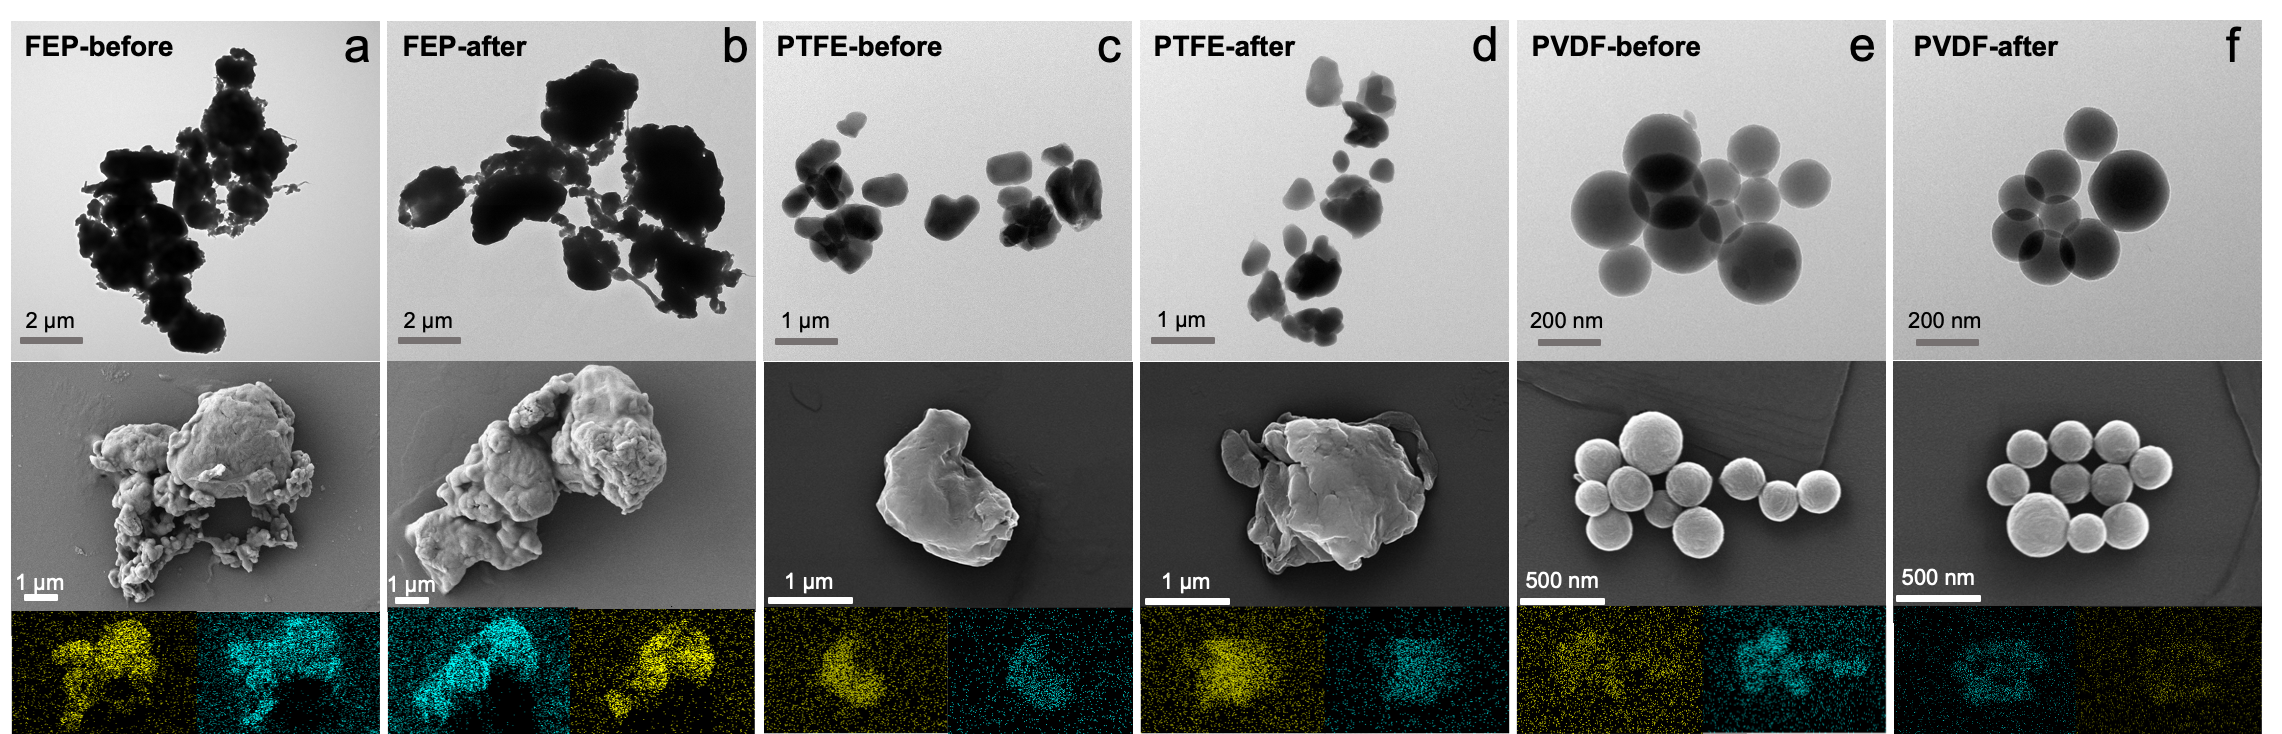


**Supplementary Figure 16**. The TEM (top), SEM (middle), and EDS of C (bottom-left) and F (bottom-right) images of before-FEP (a), after-FEP (b), before-PTFE (c), after-PTFE (d), before-PVDF (f), and after-PVDF (right).


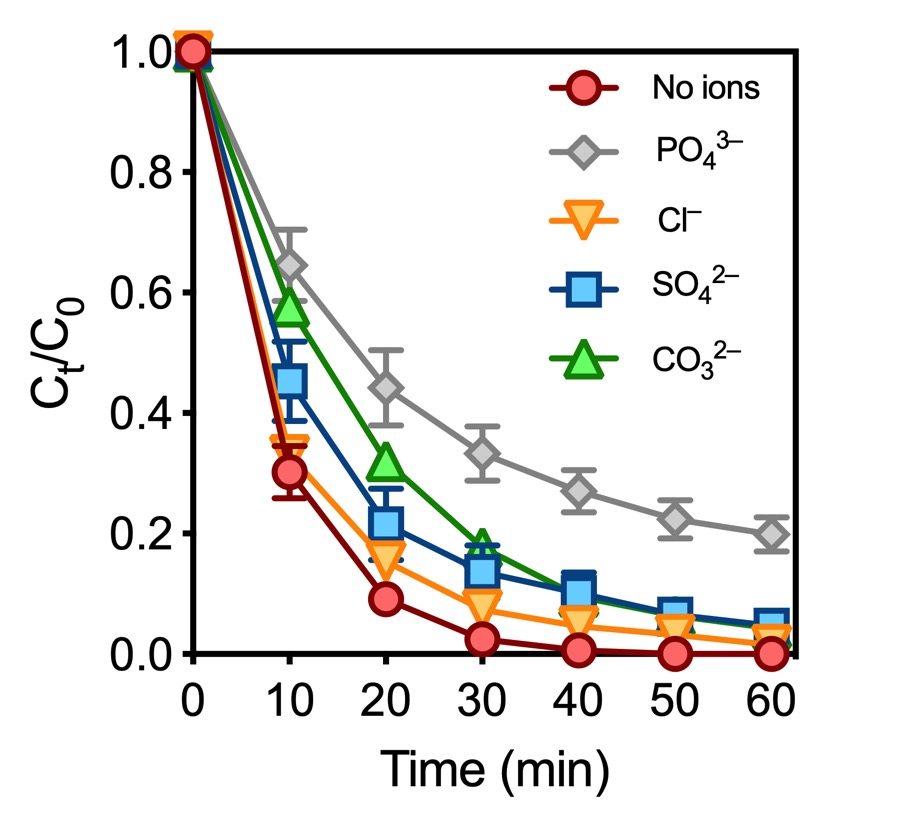


**Supplementary Figure 17**.The effect of typical ions on FeIII/FEP/CEC degradation performance.


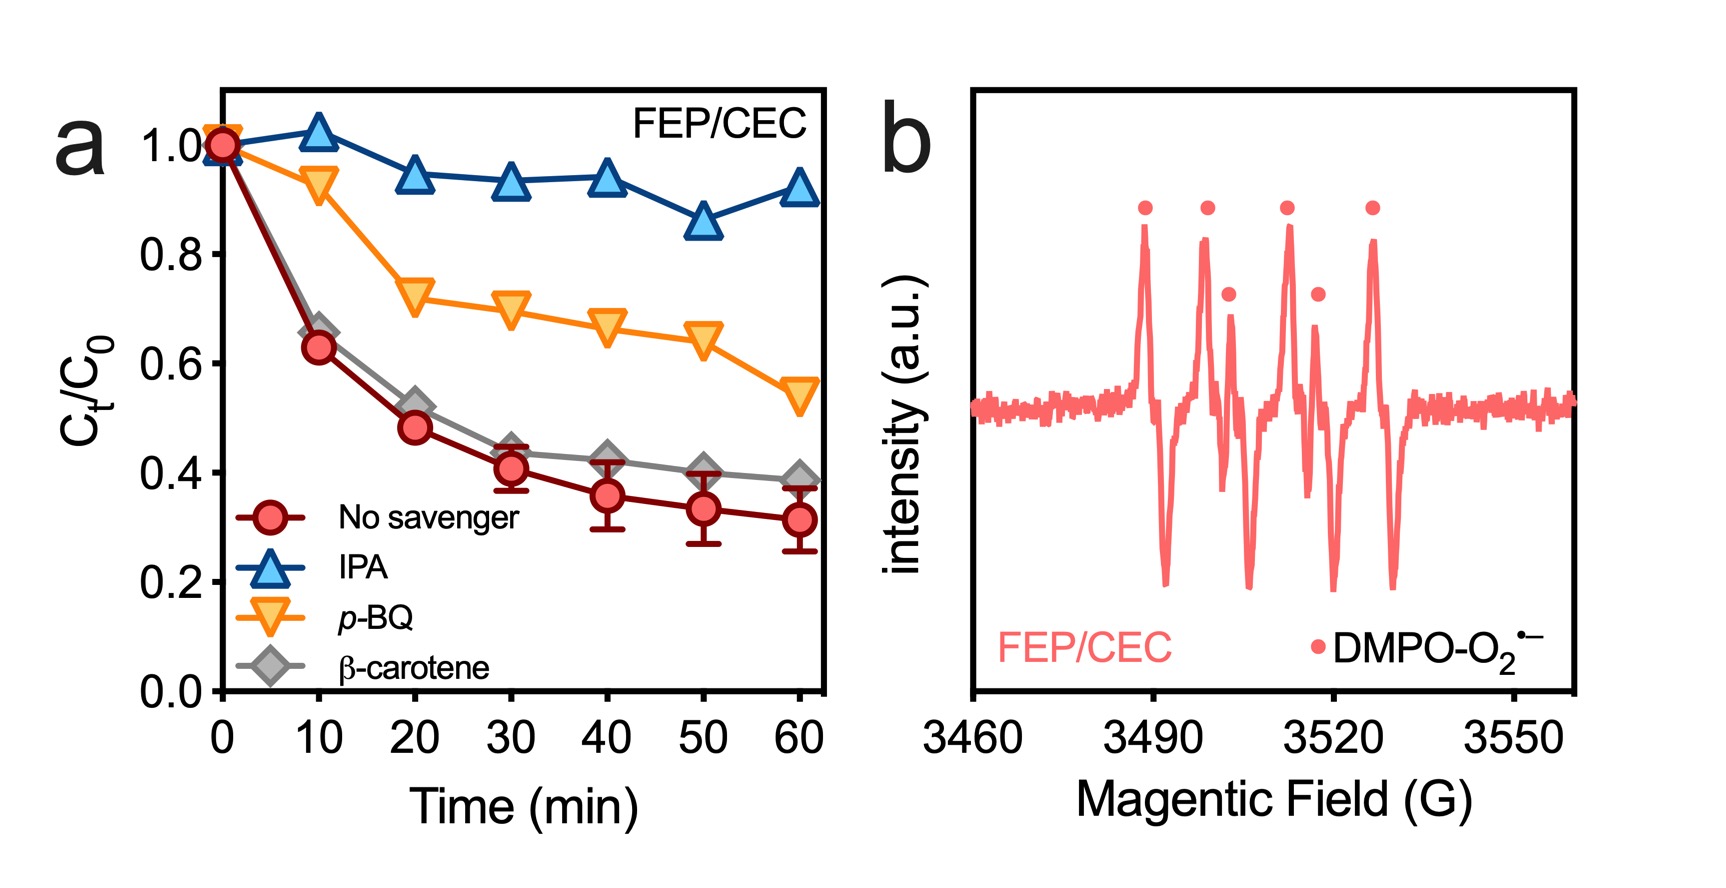


**Supplementary Figure 18.** The inhibited effect from different scavengers on SDZ degradation performance in FEP/CEC (a). The EPR signal of DMPO/DMSO- O2•−. Experimental conditions: [FEP]0 = 0.1 g·L–1, [SDZ]0 = 5 mg·L–1, [FeIII] = 1 mM, T = 25 ± 2°C, ultrasound irradiation (40 kHz, 110 W).


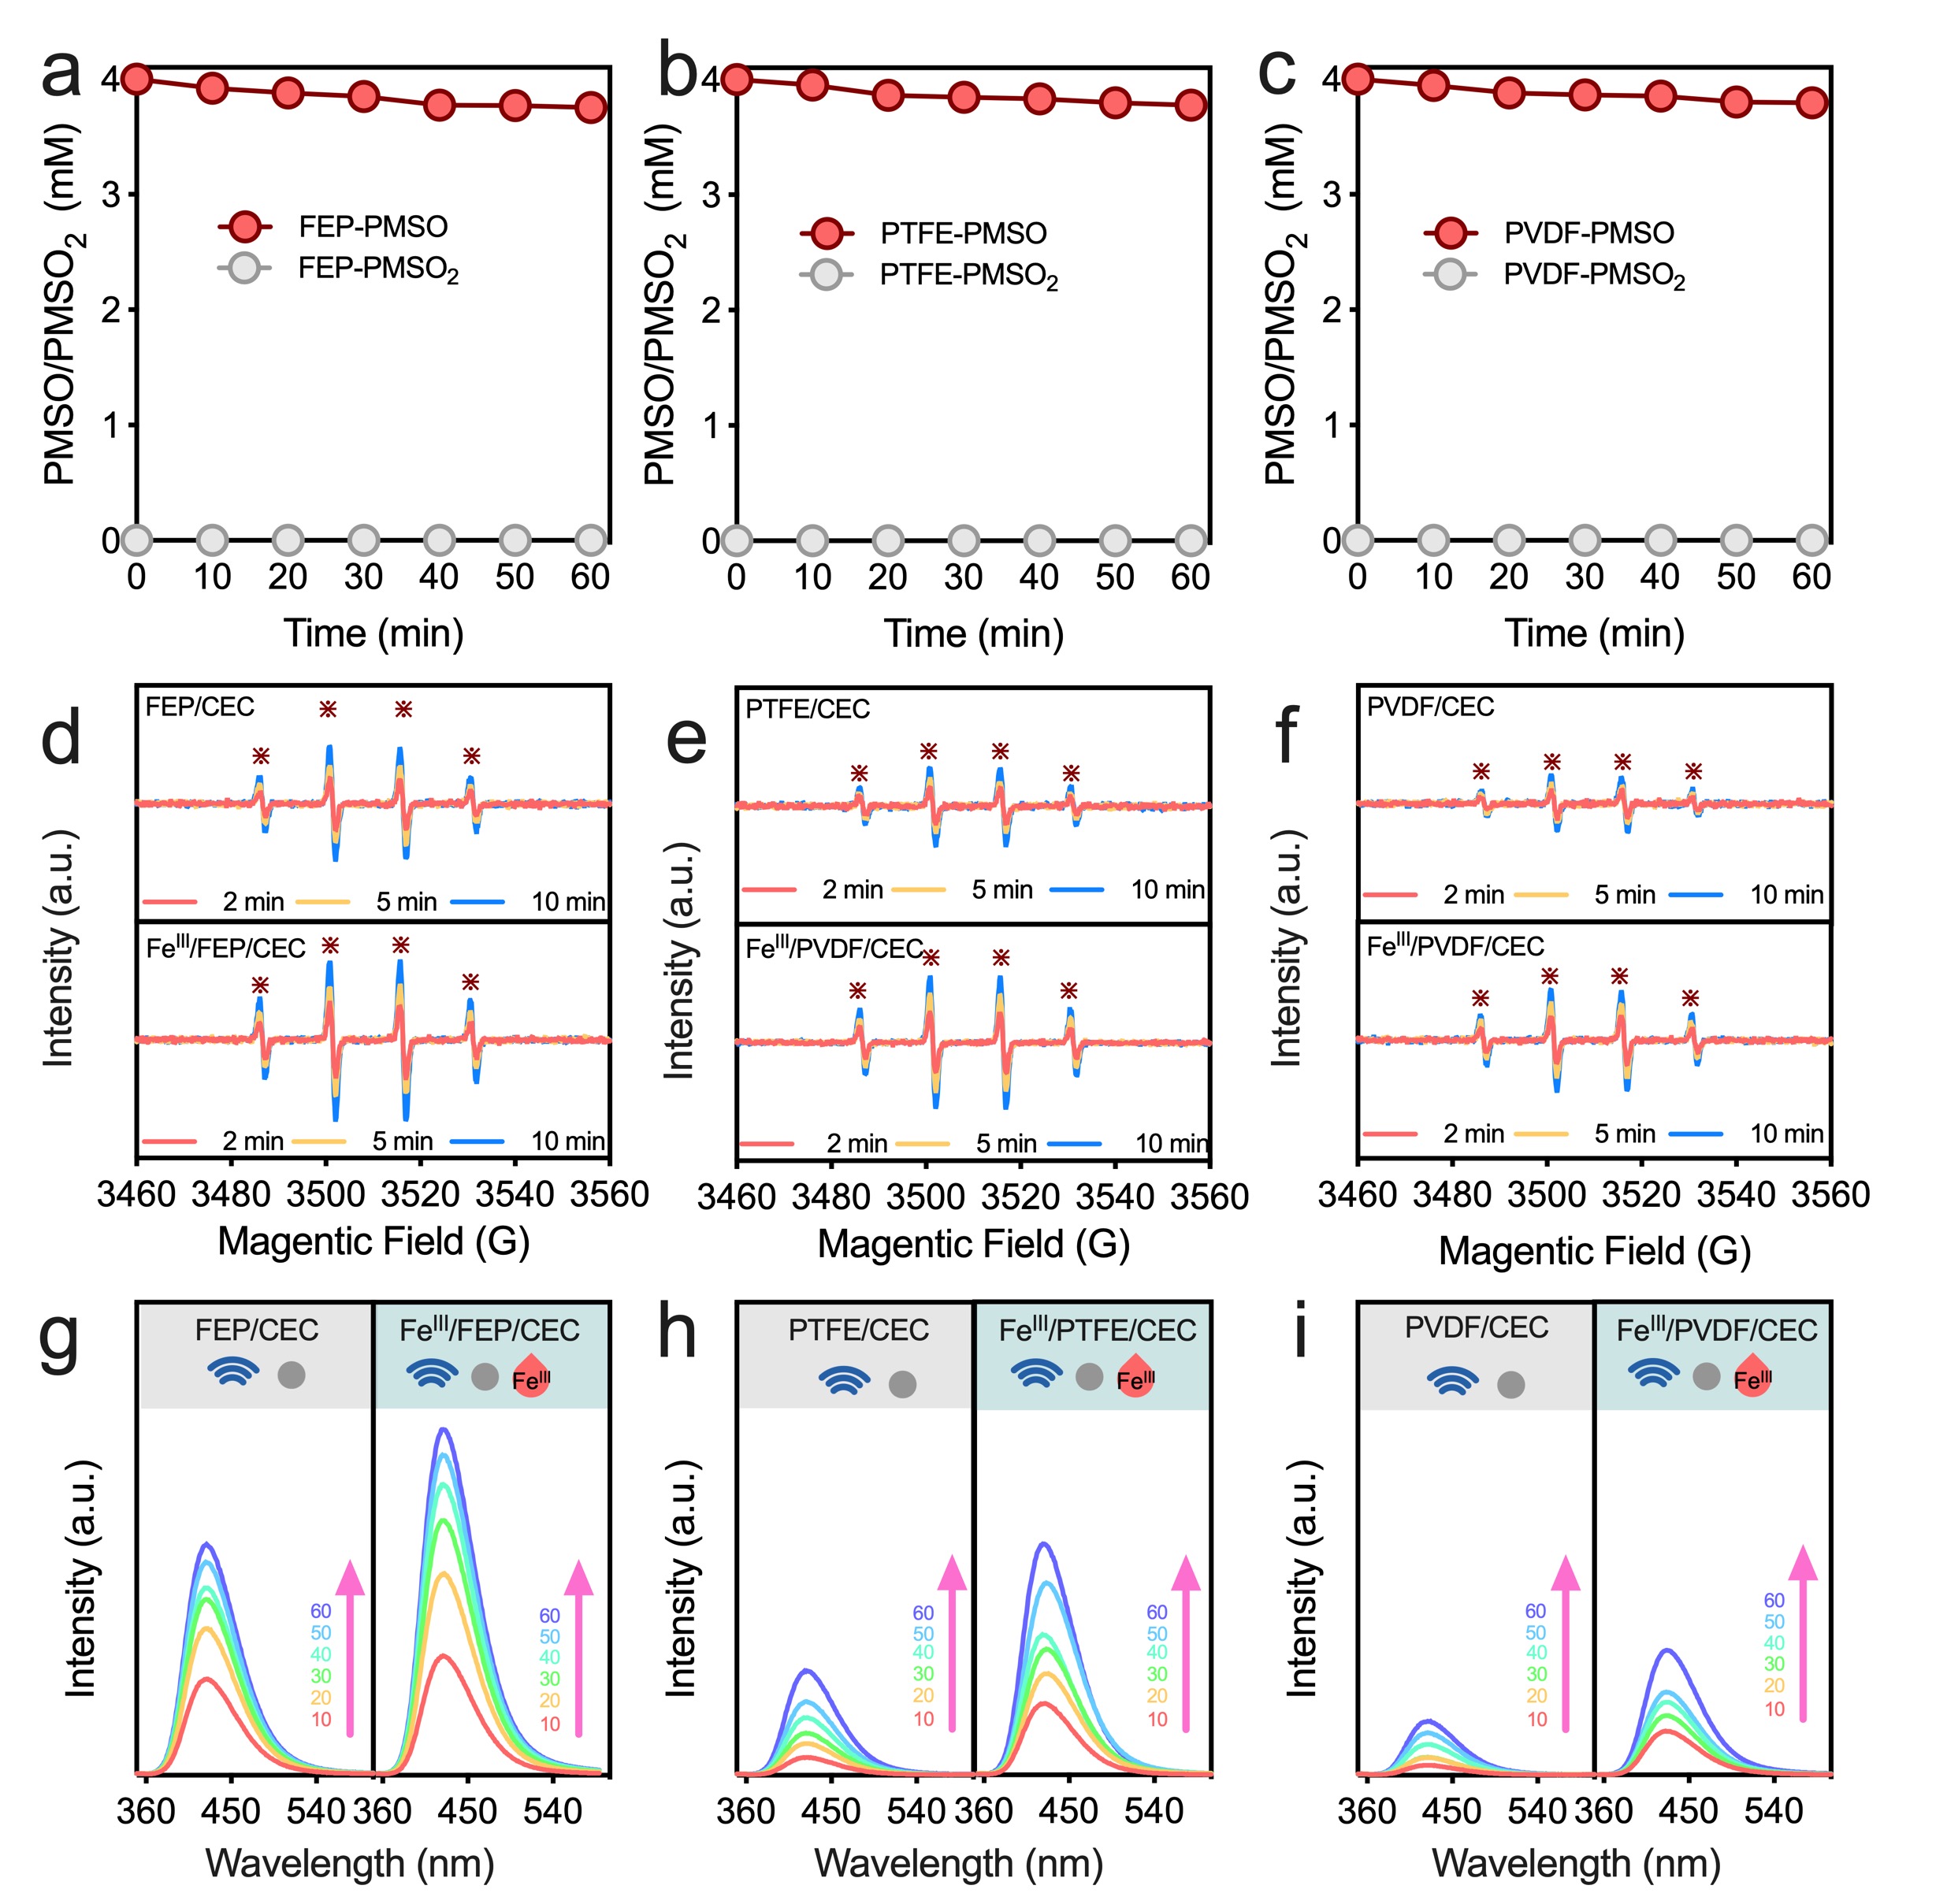


**Supplementary Figure 19.** The PMSO consumption and PMSO2 formation in FeIII/FEP/CEC (a), FeIII/PTFE/CEC (b), and FeIII/PVDF/CEC (c) over time. The EPR signals of DMPO-•OH of FEP/CEC and FeIII/FEP/CEC (d), PTFE/CEC and FeIII/PTFE/CEC (e), and PVDF/CEC and FeIII/PVDF/CEC (f), The self-quantitatively analysis of •OH yield in FEP/CEC and FeIII/FEP/CEC (g), PTFE/CEC and FeIII/PTFE/CEC (h), and PVDF/CEC and FeIII/PVDF/CEC (i).


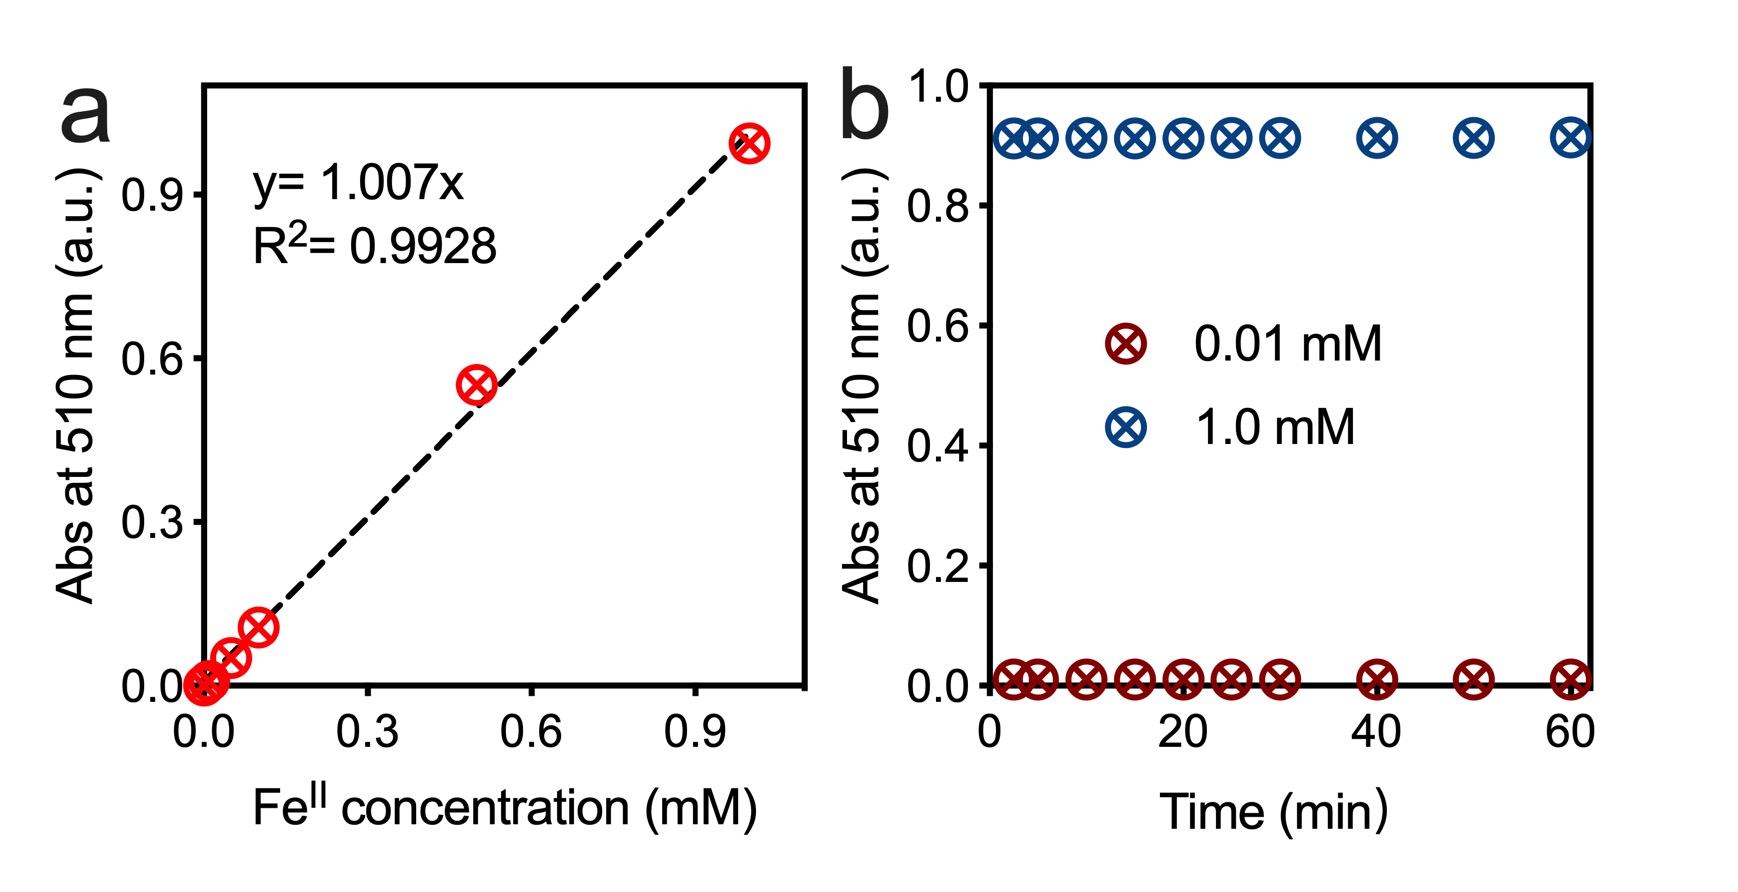


**Supplementary Figure 20.** The standard curve between the concentration of FeII and the UV absorbance at 510 nm (Linear equation: y = 1.007x, *R2*= 0.9928) (a). The stability of the observed UV absorbance at 510 nm of 0.01 mM and 1.0 mM of FeII (b).

**
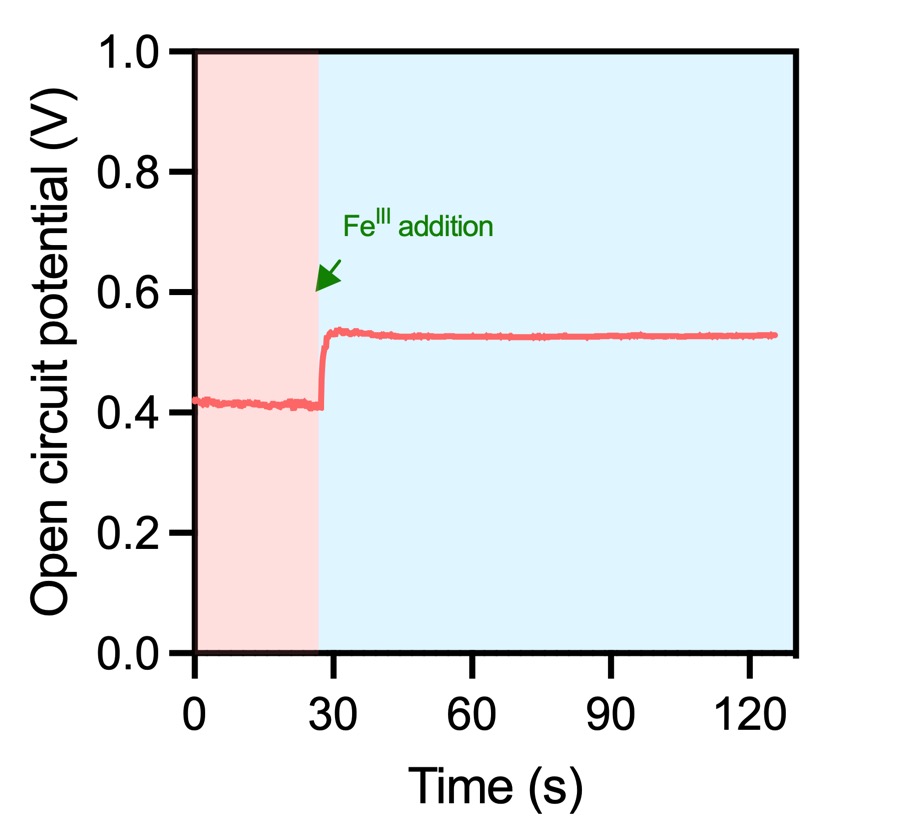
**

**Supplementary Figure 21.** The influence of FeIII on the open-circuit potential curves of FEP/CEC. Experimental conditions: [FEP]0 = 0.1 g·L–1, [FeIII] = 1 mM, T = 25 ± 2°C, ultrasound irradiation (40 kHz, 110 W).

**References**

1 Xu, T. *et al.* Mechanisms for the enhanced photo-Fenton activity of ferrihydrite modified with BiVO4 at neutral pH. *Appl. Catal., B* **212**, 50-58 (2017). <https://doi.org:https://doi.org/10.1016/j.apcatb.2017.04.064>

2 Wang, Y. *et al.* O2-independent H2O2 production via water–polymer contact electrification. *Environ. Sci. Technol.* **58**, 925-934 (2024). <https://doi.org:https://doi.org//acs.est.3c07674>

3 Wei, Y., Zhang, Y., Geng, W., Su, H. & Long, M. Efficient bifunctional piezocatalysis of Au/BiVO4 for simultaneous removal of 4-chlorophenol and Cr(VI) in water. *Appl. Catal., B* **259**, 118084 (2019). <https://doi.org:https://doi.org/10.1016/j.apcatb.2019.118084>

4 Feng, J. *et al.* Significant improvement and mechanism of ultrasonic inactivation to *Escherichia coli* with piezoelectric effect of hydrothermally synthesized t-BaTiO3. *ACS Sustainable Chem. Eng.* **6**, 6032-6041 (2018). <https://doi.org:https://doi.org/10.1021/acssuschemeng.7b04666>

5 Shao, D., Zhang, L., Sun, S. & Wang, W. Oxygen reduction reaction for generating H2O2 through a piezo-catalytic process over bismuth oxychloride. *ChemSusChem* **11 3**, 527-531 (2018). <https://doi.org:https://doi.org/10.1002/cssc.201702405>

6 Xu, J. *et al.* Highly efficient FeIII-initiated self-cycled Fenton system in piezo-catalytic process for organic pollutants degradation. *Angew. Chem. Int. Ed.* **62**, e202307018 (2023). <https://doi.org:https://doi.org/10.1002/anie.202307018>

7 Wu, Y. *et al.* Triggering dual two-electron pathway for H2O2 generation by multiple [Bi−O]n interlayers in ultrathin Bi12O17Cl2 towards efficient piezo-self-Fenton catalysis. *Angew. Chem. Int. Ed.* **63**, e202316410 (2024). <https://doi.org:https://doi.org/10.1002/anie.202316410>

8 Wang, K. *et al.* Ternary BaCaZrTi perovskite oxide piezocatalysts dancing for efficient hydrogen peroxide generation. *Nano Energy* **98**, 107251 (2022). <https://doi.org:https://doi.org/10.1016/j.nanoen.2022.107251>

9 Fu, C. *et al.* Dual-defect enhanced piezocatalytic performance of C3N5 for multifunctional applications. *Appl. Catal., B* **323**, 122196 (2023). <https://doi.org:https://doi.org/10.1016/j.apcatb.2022.122196>

10 Zeng, H. *et al.* Boost piezocatalytic H2O2 production in BiFeO3 by defect engineering enabled dual-channel reaction. *Mater. Today Energy* **39**, 101475 (2024). <https://doi.org:https://doi.org/10.1016/j.mtener.2023.101475>

11 Cui, Y. *et al.* Harvesting vibration energy to produce hydrogen peroxide with Bi3TiNbO9 nanosheets through a water oxidation dominated dual-channel pathway. *ACS Sustainable Chem. Eng.* **12**, 3595-3607 (2024). <https://doi.org:https://doi.org/10.1021/acssuschemeng.3c06572>

12 Li, W. *et al.* Boosting reactive oxygen species generation via contact-electro-catalysis with FeIII-initiated self-cycled Fenton system. *Angew. Chem. Int. Ed.* **n/a**, e202413246 (2024). <https://doi.org:https://doi.org/10.1002/anie.202413246>

13 Wu, Y. *et al.* Boosting 2e− oxygen reduction reaction in garland carbon nitride with carbon defects for high-efficient photocatalysis-self-Fenton degradation of 2,4-dichlorophenol. *Appl. Catal., B* **307**, 121185 (2022). <https://doi.org:https://doi.org/10.1016/j.apcatb.2022.121185>

14 Wang, F. *et al.* Unprecedentedly efficient mineralization performance of photocatalysis-self-Fenton system towards organic pollutants over oxygen-doped porous g-C3N4 nanosheets. *Appl. Catal., B* **312**, 121438 (2022). <https://doi.org:https://doi.org/10.1016/j.apcatb.2022.121438>
